# Supplementary material for: Determination of zenith hydrostatic delay and its impact on GNSS-derived integrated water vapor
Source: Copernicus journal article supplement (doi:10.5194/amt-10-2807-2017), 2017-08-07
Supplement: Supplementary file 1 [file amt-10-2807-2017-supplement.zip]

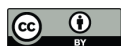

## *Supplement of*

# **Determination of zenith hydrostatic delay and its impact on GNSS-derived integrated water vapor**

**Xiaoming Wang et al.**

*Correspondence to:* Kefei Zhang (kefei.zhang@rmit.edu.au)

- [amt-10-2807-2017-supplement-title-page.pdf](#)
- Supplement
  - [Supplement1\\_6hourly.xlsx](#)
  - [Supplment2\\_Monthly.xlsx](#)
  - [SupplmentNEW.xlsx](#)
  - [T\\_4nd\\_revision\\_20170413.docx](#)
  - [w Microsoft Word Document.docx](#)

The copyright of individual parts of the supplement might differ from the CC BY 3.0 License.
