# Supplementary material for: Determination of zenith hydrostatic delay and its impact on GNSS-derived integrated water vapor
Source: Copernicus journal article supplement (doi:10.5194/amt-10-2807-2017), 2017-08-07
Supplement: Supplementary file 1 [file Supplement1_6hourly.xlsx]

## Sheet: Pressure
Station	Latitude	Longitude	P_GPT2w (hPa)		P_ERA1 (hPa)		P_ERA4 (hPa)		Number of observations	IWV mean (kg m-2)
			Biase	RMS	Biase	RMS	Biase	RMS
DAV1	-68.5773	77.9726	-0.0645	9.3159	-0.357	0.6973	-0.1222	0.5551	8733	3.502
OHIG	-63.3207	302.1	1.0356	9.5246	-1.365	2.2722	-1.2771	2.1134	240	7.951
RIO2	-53.7855	292.249	1.4729	11.5904	0.2833	0.6928	0.0126	0.583	6316	9.997
RIOG	-53.7855	292.249	0.2002	11.8626	0.4262	0.8057	0.2046	0.6651	5196	10.54
OUS2	-45.8695	170.511	-0.6656	10.3659	-0.2809	1.1882	-0.283	1.1269	11190	14.83
CHAT	-43.9558	183.434	1.0356	10.8937	0.6374	0.8538	0.5508	0.793	3173	16.306
MQZG	-43.7027	172.655	-0.1577	9.9174	0.0716	0.7677	0.1907	0.7143	6171	14.541
WEL1	-41.2726	174.779	0.3151	10.7654	-0.1028	0.7594	-0.3836	0.6384	1036	15.408
CONZ	-36.8438	286.974	-1.4918	3.776	-1.3638	1.4859	-1.4118	1.5344	8565	14.011
AUCK	-36.6028	174.834	-0.5545	7.5372	-1.0121	1.1367	-0.9317	0.9943	3393	18.423
LPGS	-34.9067	302.068	-0.6053	5.6947	-0.683	1.1008	-0.6685	1.057	11027	20.112
ADE1	-34.729	138.647	-0.4879	6.7097	-0.7853	0.8693	-0.7791	0.8452	3433	15.784
SUTM	-32.3814	20.8109	0.2534	3.5322	-0.7684	0.9017	-0.719	0.8742	12342	7.233
YAR3	-29.0465	115.347	0.5417	4.2609	0.2081	0.4258	0.0778	0.5039	1943	18.444
PRE1	-25.7463	28.224	-0.3008	3.1029	-0.6088	0.6794	-0.546	0.628	2201	15.86
UNSA	-24.7275	294.592	-0.1299	4.2591	-0.5777	0.9611	-0.1019	1.1238	6188	19.547
ALIC	-23.6701	133.886	0.5579	3.5747	0.0237	0.3945	0.0777	0.3512	7747	18.715
CHPI	-22.6871	315.015	0.2104	3.068	0.0047	0.5492	0.049	0.5433	11444	29.874
WIND	-22.5749	17.0894	-0.4672	1.9735	-0.8141	0.9586	-0.794	0.926	6452	13.007
KARR	-20.9814	117.097	0.98	2.3722	0.2234	0.4111	0.4544	0.5663	1102	23.491
TOW2	-19.2693	147.056	-0.9432	2.9743	-0.9221	0.9979	-1.0011	1.0645	3994	33.803
TAH1	-17.577	210.394	-1.301	2.4679	-0.2338	0.5033	-0.3371	0.511	1871	36.216
KAT1	-14.376	132.153	0.6381	2.5144	0.2092	0.3873	0.1226	0.4711	808	32.075
DARW	-12.8437	131.133	0.3377	2.2939	0.2482	0.4382	0.2565	0.4312	9391	39.576
COCO	-12.1883	96.834	-0.007	1.5491	0.428	0.5636	0.3507	0.5036	5089	42.273
XMIS	-10.45	105.689	-0.3766	1.5914	-0.5323	0.7526	-0.4716	0.6993	3038	39.352
NURK	-1.9446	30.0897	-0.5058	1.676	-0.9477	1.0696	-0.8693	1.0064	4380	27.941
MSKU	-1.6316	13.552	0.2265	1.6002	0.324	0.6873	0.2755	0.6579	3107	46.687
GLPS	-0.743	269.696	-0.6928	1.5044	0.4226	0.6305	0.3951	0.614	1037	41.759
MBAR	-0.6015	30.7379	0.0316	1.6122	-0.2046	0.6144	-0.1419	0.6073	6678	30.15
MANA	12.1489	273.751	0.008	1.3666	-0.0645	0.4928	0.0247	0.4448	1340	46.192
IISC	13.0212	77.5704	-0.0398	1.8831	-0.3765	0.5166	-0.4583	0.5999	8081	31.068
BAN2	13.0343	77.5116	-0.8311	2.0558	-0.8994	1.0488	-0.9593	1.1144	6147	29.786
SSIA	13.6971	270.883	-0.1304	1.3648	-0.7441	0.8171	-0.4952	0.6022	1353	37.715
DAKA	14.6845	342.535	-1.8507	2.5253	-1.1463	1.2352	-1.2426	1.3253	3169	30.728
KOKB	22.1263	200.335	1.281	2.4564	0.3829	0.9609	0.6191	1.1278	5375	15.947
TCMS	24.798	120.987	0.8312	3.5772	0.6812	1.0867	0.7743	1.1148	6461	39.601
TNML	24.798	120.987	1.2531	3.9222	0.8278	1.195	0.9354	1.2461	6359	40.245
TWTF	24.9536	121.165	0.2989	3.4191	0.3916	0.8076	0.4453	0.9538	14130	37.868
AOML	25.7347	279.838	-0.5701	2.9332	-0.1247	0.3561	-0.1032	0.355	5725	33.96
BAHR	26.2091	50.6081	-0.7457	2.9406	-0.9468	1.2008	-0.9213	1.1849	12220	18.733
WUHN	30.5317	114.357	3.0939	6.25	2.9076	4.2098	2.9636	4.2602	11904	31.978
SIO3	32.8647	242.75	-0.4039	2.7947	-0.2137	0.4095	-0.4666	0.6555	6224	16.175
JPLM	34.2048	241.827	0.6295	2.9583	0.5494	0.679	0.5948	0.809	17031	14.345
DAEJ	36.3994	127.374	0.1573	4.7647	0.0804	0.4268	0.0198	0.4963	10429	20.847
OSN1	37.0776	127.024	-0.1744	4.6406	-0.6441	0.7999	-0.6481	0.7523	1776	20.685
PDEL	37.7477	334.337	-0.7064	7.0686	-0.0489	0.5546	-0.091	0.5159	17623	23.335
SOL1	38.3189	283.546	-0.1993	6.6578	0.246	0.5554	0.184	0.5079	5721	22.222
USNO	38.919	282.934	-0.3181	7.2167	-0.0965	1.4833	-0.0819	1.4529	10687	20.905
WDC3	38.9206	282.934	-0.0086	7.2123	-0.4943	0.6728	-0.4952	0.6391	3068	20.168
MIZU	39.1352	141.133	-1.081	6.6523	-0.8654	1.143	-0.8554	1.1404	9785	19.909
ANKR	39.8874	32.7585	0.0499	4.179	-0.1617	1.3296	-0.0371	1.3803	4469	12.982
NSSP	40.2265	44.5029	0.404	4.4513	0.7308	1.5418	0.6902	1.4298	4878	13.022
VILL	40.4436	356.048	0.1354	5.3345	0.4206	1.2472	0.4654	1.2634	1391	15.029
MATE	40.6491	16.7045	-1.2905	5.7319	-0.3859	0.8578	-0.3653	0.79	2657	14.635
TRAB	40.9947	39.7756	0.3334	5.3769	0.3012	0.8263	0.436	1.017	5428	20.113
TASH	41.328	69.2956	0.5979	4.8084	0.0055	0.8547	-0.2127	0.7427	12298	13.158
SOFI	42.5561	23.3947	3.0211	6.3772	2.8764	3.6725	2.8742	3.6452	6871	14.461
WES2	42.6133	288.507	-1.7617	8.552	-1.4238	1.5616	-1.5669	1.6539	6616	16.655
GUAO	43.4711	87.1773	-0.057	3.3742	0.1093	1.1901	0.1241	1.0051	12506	7.75
ZECK	43.7884	41.5651	0.7919	4.6076	0.4731	0.9322	0.6048	1.067	7704	12.625
CHAN	43.7907	125.444	-0.7835	3.6526	0.1099	0.3187	0.2193	0.4068	304	16.976
URUM	43.8079	87.6007	-0.2132	4.7522	-0.8542	1.061	-0.9309	1.1631	5458	10.052
BARH	44.395	291.778	-0.5416	8.8119	0.0534	0.7385	0.1242	0.7028	3721	15.79
CRAO	44.4133	33.991	0.8359	5.9485	0.3923	0.9617	0.3603	0.8475	6745	16.054
HLFX	44.6835	296.389	-0.9474	8.9794	-0.9286	1.0788	-1.0155	1.1268	5750	16.666
NRC1	45.4542	284.376	-1.4368	8.2345	-1.4362	1.6247	-1.4889	1.6426	14340	14.562
UNBJ	45.9502	293.358	0.5353	8.8085	0.1191	0.3904	0.1225	0.4184	3604	15.394
ALGO	45.9558	281.929	-0.42	7.8209	-0.3763	1.252	-0.2756	1.3026	9617	14.53
ZIMM	46.8771	7.4653	-0.6372	6.7431	-0.1989	0.8214	-0.3779	0.5851	19216	12.876
YSSK	47.0297	142.717	-0.5351	7.4181	-0.3543	0.7679	-0.2858	0.6648	15082	13.337
GRAZ	47.0671	15.4935	-1.493	6.1132	0.4748	0.8109	0.3561	0.5636	1654	16.727
STJO	47.5952	307.322	-0.9339	9.9628	-0.3486	1.6556	-0.5269	1.6429	12447	14.53
PENC	47.7896	19.2815	-1.6059	7.2197	-1.1671	1.6069	-1.2169	1.6159	5128	16.096
ULAB	47.8651	107.052	0.2864	5.3709	0.1205	0.4657	0.0553	0.4176	9583	6.41
VALD	48.0971	282.436	-0.0484	7.9515	-0.2956	0.7008	-0.3455	0.654	7614	12.793
ALBH	48.3898	236.512	-1.2652	7.0137	-0.7009	1.74	-0.8495	1.7369	10532	15.247
WTZR	49.1442	12.8789	-1.3375	7.4669	-1.3135	1.4506	-1.1945	1.2765	8323	13.058
DRAO	49.3226	240.375	-1.062	6.9019	-1.2781	1.8137	-1.1731	1.7936	9751	11.792
GOPE	49.9137	14.7856	-0.269	7.9674	-0.2696	3.234	-0.1387	3.2186	17588	13.656
TITZ	51.0353	6.4316	0.8442	9.2171	0.6301	0.705	0.5235	0.5972	9389	16.773
WROC	51.1133	17.062	-1.9124	8.6882	-1.6437	2.3078	-1.8062	2.4111	15503	16.053
HRM1	51.4537	358.716	-0.3383	9.7761	-0.6423	0.6956	-0.529	0.5814	2194	16.707
JOZE	52.0973	21.0315	-0.7742	8.734	-0.7559	0.9104	-0.6875	0.8624	14093	15.427
JOZ2	52.0978	21.0324	-2.1019	8.8544	-2.0889	2.1473	-2.0188	2.0831	12772	15.221
BOR1	52.277	17.0735	3.7072	9.3035	3.1861	3.255	3.2346	3.3033	8507	17.265
POTS	52.3793	13.0661	-1.2503	8.9975	-1.5149	1.5511	-1.6025	1.6211	8739	14.775
PETP	53.0667	158.607	0.4489	9.9167	-0.7057	0.8832	-0.5499	0.8213	4007	9.902
SCH2	54.8321	293.167	-0.9523	8.728	-1.037	1.9858	-0.8679	1.8727	12996	9.283
ZWE2	55.6993	36.7584	-1.1901	9.3749	-0.7806	0.867	-0.6999	0.8121	7455	13.514
ZWEN	55.6993	36.7586	-0.1642	7.954	-0.1613	0.3557	-0.116	0.3614	864	15.534
ARTU	56.4298	58.5605	-0.1479	9.9689	-0.0908	0.4202	-0.0066	0.4521	8642	12.182
RIGA	56.9486	24.0588	0.1122	9.6588	-0.2005	0.4849	-0.0443	0.2916	7375	14.846
CHUR	58.7591	265.911	0.0152	8.8269	-0.1131	0.8781	-0.2297	0.8687	12767	9.639
MAG0	59.5758	150.77	-0.3042	8.3016	-1.4218	1.5484	-1.0987	1.2221	5262	7.953
QAQ1	60.7153	313.952	0.6836	10.9727	-0.6193	1.3537	-0.6213	1.3004	15759	9.326
WHIT	60.7505	224.778	2.6839	8.5146	2.001	2.1912	1.8869	2.0586	7033	7.202
YAKT	62.031	129.68	-0.052	7.7564	-0.1368	0.57	-0.1326	0.5636	14301	9.686
YAKZ	62.031	129.681	1.3615	9.2921	0.9765	1.191	0.9109	1.1412	59	3.747
YELL	62.4809	245.519	1.1071	9.6815	0.8522	1.1888	0.7863	1.1119	11661	9.602
HOFN	64.2673	344.802	0.059	12.3505	0.021	0.7007	0.0431	0.7191	5568	12.722
EIL1	64.6879	212.887	0.0441	10.1841	-0.1136	1.0495	-0.2629	0.9603	3232	10.161
FAIR	64.978	212.501	-0.1217	9.8445	-0.1736	1.1397	-0.0361	1.2147	5142	8.578
BILI	68.0761	166.438	0.8316	8.1283	0.2677	1.0085	0.2361	0.7688	3785	6.898
SCOR	70.4853	338.05	0.2436	11.486	-0.1297	0.6153	-0.116	0.6075	9515	6.853
TIXI	71.6345	128.866	0.9118	9.2473	0.1798	0.7257	0.285	0.8358	6133	6.822
THU2	76.537	291.175	1.1307	10.1957	0.7171	1.0098	0.6306	0.9379	15270	5.872
THU3	76.537	291.175	1.268	10.2877	0.7175	1.008	0.6299	0.9366	13766	5.668

## Sheet: ZHD
Station	Latitude	Longitude	ZHD_GPT2w (mm)		ZHD_ERA1 (mm)		ZHD_ERA4 (mm)
			Biase	RMS	Biase	RMS	Biase	RMS
DAV1	-68.5773	77.9726	-0.1459	21.1709	-0.8321	1.5959	-0.2739	1.2612
OHIG	-63.3207	302.1	2.3587	21.6547	-3.1166	5.1757	-2.9045	4.8074
RIO2	-53.7855	292.249	3.3513	26.3679	0.6218	1.5673	0.0258	1.3266
RIOG	-53.7855	292.249	0.4554	26.9871	0.9481	1.822	0.464	1.5131
OUS2	-45.8695	170.511	-1.5158	23.5987	-0.6634	2.7111	-0.647	2.5664
CHAT	-43.9558	183.434	2.3577	24.8057	1.406	1.9105	1.2474	1.801
MQZG	-43.7027	172.655	-0.3584	22.5845	0.0566	1.7418	0.4275	1.6251
WEL1	-41.2726	174.779	0.7196	24.5187	-0.2734	1.7351	-0.8832	1.4595
CONZ	-36.8438	286.974	-3.3995	8.6046	-3.2356	3.5035	-3.2336	3.5115
AUCK	-36.6028	174.834	-1.2641	17.1741	-2.4047	2.678	-2.1501	2.291
LPGS	-34.9067	302.068	-1.3794	12.9777	-1.5898	2.5298	-1.5401	2.4194
ADE1	-34.729	138.647	-1.1126	15.2917	-1.8286	2.0167	-1.7822	1.9326
SUTM	-32.3814	20.8109	0.5773	8.0559	-2.7141	2.9197	-1.6484	2.001
YAR3	-29.0465	115.347	1.2378	9.7166	0.306	0.9019	0.1879	1.1516
PRE1	-25.7463	28.224	-0.6859	7.0772	-2.1909	2.2967	-1.2576	1.444
UNSA	-24.7275	294.592	-0.298	9.717	-2.042	2.6912	-0.2515	2.566
ALIC	-23.6701	133.886	1.2706	8.1545	-0.332	0.9586	0.1622	0.7984
CHPI	-22.6871	315.015	0.4814	6.9995	-0.381	1.31	0.1092	1.2393
WIND	-22.5749	17.0894	-1.0657	4.504	-2.7988	3.0282	-1.8247	2.1244
KARR	-20.9814	117.097	2.2348	5.4148	0.419	0.8918	1.0295	1.286
TOW2	-19.2693	147.056	-2.1544	6.79	-2.1823	2.3493	-2.3351	2.4767
TAH1	-17.577	210.394	-2.9705	5.6322	-0.6222	1.1928	-0.7896	1.1803
KAT1	-14.376	132.153	1.4568	5.7411	0.3369	0.8186	0.2362	1.0668
DARW	-12.8437	131.133	0.7715	5.2352	0.4628	0.9457	0.5379	0.9572
COCO	-12.1883	96.834	-0.0167	3.5352	0.9748	1.285	0.8081	1.1549
XMIS	-10.45	105.689	-0.8602	3.6341	-1.4026	1.855	-1.0885	1.6038
NURK	-1.9446	30.0897	-1.1538	3.8252	-2.9959	3.2028	-1.9799	2.2937
MSKU	-1.6316	13.552	0.5193	3.6534	0.4908	1.4683	0.6124	1.4951
GLPS	-0.743	269.696	-1.5801	3.4342	0.9383	1.4223	0.8867	1.3924
MBAR	-0.6015	30.7379	0.0709	3.6815	-1.2326	1.8082	-0.3216	1.386
MANA	12.1489	273.751	0.0156	3.118	-0.2172	1.1351	0.0373	1.0131
IISC	13.0212	77.5704	-0.0916	4.2983	-1.3714	1.5915	-1.003	1.337
BAN2	13.0343	77.5116	-1.898	4.6933	-2.5601	2.841	-2.147	2.5071
SSIA	13.6971	270.883	-0.2982	3.1182	-2.0998	2.237	-1.1403	1.3829
DAKA	14.6845	342.535	-4.225	5.7637	-2.6689	2.8681	-2.8709	3.0575
KOKB	22.1263	200.335	2.9249	5.6073	0.1902	2.0198	1.4013	2.5671
TCMS	24.798	120.987	1.8965	8.1586	1.4846	2.4355	1.7426	2.5263
TNML	24.798	120.987	2.857	8.9447	1.82	2.6789	2.1104	2.8248
TWTF	24.9536	121.165	0.682	7.7984	0.7459	1.7752	0.9937	2.1654
AOML	25.7347	279.838	-1.3003	6.6895	-0.303	0.8189	-0.2284	0.8077
BAHR	26.2091	50.6081	-1.6991	6.7063	-2.1668	2.7446	-2.0941	2.6972
WUHN	30.5317	114.357	7.0531	14.2474	6.5961	9.5746	6.7575	9.7127
SIO3	32.8647	242.75	-0.9203	6.37	-0.5244	0.9541	-1.0472	1.4827
JPLM	34.2048	241.827	1.4342	6.7418	0.9777	1.3354	1.3738	1.8578
DAEJ	36.3994	127.374	0.3583	10.8569	0.0953	0.9598	0.0249	1.1302
OSN1	37.0776	127.024	-0.3999	10.5733	-1.5117	1.8589	-1.4967	1.7318
PDEL	37.7477	334.337	-1.6098	16.1041	-0.1955	1.2742	-0.2485	1.1837
SOL1	38.3189	283.546	-0.4543	15.1687	0.5609	1.2654	0.4379	1.1639
USNO	38.919	282.934	-0.7236	16.4406	-0.2621	3.3824	-0.1677	3.3093
WDC3	38.9206	282.934	-0.0187	16.4294	-1.1735	1.5689	-1.1088	1.4421
MIZU	39.1352	141.133	-2.4639	15.1552	-2.0574	2.6698	-1.9776	2.6198
ANKR	39.8874	32.7585	0.1144	9.5258	-0.9443	3.1469	-0.0994	3.1409
NSSP	40.2265	44.5029	0.92	10.1426	0.9805	3.2457	1.568	3.2556
VILL	40.4436	356.048	0.3091	12.1531	0.5571	2.7307	1.0325	2.8669
MATE	40.6491	16.7045	-2.9411	13.0571	-1.2166	2.1278	-0.858	1.8123
TRAB	40.9947	39.7756	0.758	12.2473	0.6113	1.856	0.9739	2.3081
TASH	41.328	69.2956	1.3603	10.9517	-0.267	1.9654	-0.456	1.684
SOFI	42.5561	23.3947	6.8817	14.5265	5.906	7.8704	6.533	8.2925
WES2	42.6133	288.507	-4.0127	19.4748	-3.3067	3.6147	-3.551	3.7499
GUAO	43.4711	87.1773	-0.1304	7.688	-0.7827	2.8109	0.3294	2.2967
ZECK	43.7884	41.5651	1.8041	10.4952	0.4116	1.876	1.3742	2.4287
CHAN	43.7907	125.444	-1.7921	8.318	0.0707	0.6857	0.4922	0.9229
URUM	43.8079	87.6007	-0.4842	10.8238	-2.4527	2.8408	-2.0751	2.6131
BARH	44.395	291.778	-1.2321	20.0643	0.1099	1.6802	0.2992	1.603
CRAO	44.4133	33.991	1.9039	13.548	0.658	2.1054	0.8079	1.9255
HLFX	44.6835	296.389	-2.1568	20.4442	-2.123	2.464	-2.2973	2.5525
NRC1	45.4542	284.376	-3.2732	18.7484	-3.3296	3.7521	-3.3666	3.7188
UNBJ	45.9502	293.358	1.2198	20.0541	0.2502	0.8835	0.2954	0.9583
ALGO	45.9558	281.929	-0.9553	17.8056	-0.9897	2.8935	-0.601	2.9603
ZIMM	46.8771	7.4653	-1.4511	15.3538	-1.0156	2.08	-0.8804	1.3453
YSSK	47.0297	142.717	-1.2175	16.887	-0.8707	1.7785	-0.6643	1.5193
GRAZ	47.0671	15.4935	-3.4003	13.919	0.7445	1.671	0.7866	1.2684
STJO	47.5952	307.322	-2.1263	22.6792	-0.8963	3.7916	-1.2025	3.7407
PENC	47.7896	19.2815	-3.657	16.4366	-2.8457	3.7988	-2.7928	3.6971
ULAB	47.8651	107.052	0.6515	12.2295	-0.5687	1.1719	0.1623	0.9573
VALD	48.0971	282.436	-0.1111	18.1004	-0.8728	1.689	-0.7584	1.4738
ALBH	48.3898	236.512	-2.8757	15.9635	-1.6211	3.9706	-1.9189	3.9461
WTZR	49.1442	12.8789	-3.0433	16.997	-3.3942	3.6722	-2.7367	2.9225
DRAO	49.3226	240.375	-2.4164	15.711	-3.2418	4.3692	-2.6511	4.0702
GOPE	49.9137	14.7856	-0.6134	18.1348	-0.9768	7.3995	-0.3346	7.3264
TITZ	51.0353	6.4316	1.9224	20.9746	1.3302	1.5128	1.1667	1.338
WROC	51.1133	17.062	-4.3516	19.7712	-3.8588	5.3365	-4.1301	5.5015
HRM1	51.4537	358.716	-0.7673	22.2468	-1.569	1.6828	-1.2286	1.3461
JOZE	52.0973	21.0315	-1.7622	19.8728	-1.8127	2.1493	-1.5782	1.9736
JOZ2	52.0978	21.0324	-4.7802	20.1469	-4.8529	4.9833	-4.6073	4.7532
BOR1	52.277	17.0735	8.4353	21.167	7.1672	7.3257	7.343	7.4996
POTS	52.3793	13.0661	-2.8451	20.4718	-3.5426	3.6229	-3.6668	3.7089
PETP	53.0667	158.607	1.0199	22.5646	-1.7398	2.1183	-1.2593	1.8743
SCH2	54.8321	293.167	-2.167	19.8568	-2.6607	4.6826	-1.9497	4.2493
ZWE2	55.6993	36.7584	-2.7094	21.3258	-1.9079	2.0925	-1.5929	1.8482
ZWEN	55.6993	36.7586	-0.3738	18.0916	-0.4976	0.8763	-0.2653	0.8215
ARTU	56.4298	58.5605	-0.3357	22.6748	-0.3619	1.0016	-0.0014	1.0287
RIGA	56.9486	24.0588	0.2541	21.9672	-0.4784	1.1124	-0.1066	0.6653
CHUR	58.7591	265.911	0.0338	20.0719	-0.244	1.9953	-0.4827	1.9659
MAG0	59.5758	150.77	-0.6922	18.8789	-3.4541	3.7251	-2.4969	2.7779
QAQ1	60.7153	313.952	1.5536	24.9482	-1.4763	3.1101	-1.4263	2.9635
WHIT	60.7505	224.778	6.1052	19.3671	3.7848	4.2963	4.3117	4.7008
YAKT	62.031	129.68	-0.1182	17.6341	-0.3741	1.3126	-0.2864	1.2784
YAKZ	62.031	129.681	3.0966	21.1333	2.161	2.6551	2.0878	2.6042
YELL	62.4809	245.519	2.5178	22.0111	1.8268	2.6245	1.8169	2.5487
HOFN	64.2673	344.802	0.1344	28.0757	-0.0011	1.5919	0.0679	1.633
EIL1	64.6879	212.887	0.1002	23.1482	-0.365	2.3992	-0.5912	2.1809
FAIR	64.978	212.501	-0.2771	22.3767	-0.5879	2.6266	-0.0744	2.7606
BILI	68.0761	166.438	1.8916	18.4739	0.3384	2.2365	0.5519	1.7529
SCOR	70.4853	338.05	0.5533	26.0972	-0.3693	1.4154	-0.2844	1.384
TIXI	71.6345	128.866	2.0692	21.0092	0.3849	1.6437	0.6665	1.9061
THU2	76.537	291.175	2.5679	23.1595	1.6142	2.2834	1.438	2.1345
THU3	76.537	291.175	2.8801	23.3685	1.615	2.2794	1.4365	2.1316

## Sheet: IWV
Station	Latitude	Longitude	IWV_GPT2w (mm)		IWV_ERA1 (mm)		IWV_ERA4 (mm)
			Biase	RMS	Biase	RMS	Biase	RMS
DAV1	-68.5773	77.9726	0.02	3.07	0.12	0.23	0.04	0.18
OHIG	-63.3207	302.1	0.25	3.2	0.5	0.85	0.43	0.79
RIO2	-53.7855	292.249	-0.53	4.05	-0.1	0.24	-0.01	0.21
RIOG	-53.7855	292.249	-0.07	4.16	-0.15	0.28	-0.07	0.23
OUS2	-45.8695	170.511	0.23	3.69	0.1	0.42	0.1	0.39
CHAT	-43.9558	183.434	-0.36	3.86	-0.22	0.3	-0.2	0.28
MQZG	-43.7027	172.655	0.13	3.47	-0.01	0.27	-0.07	0.25
WEL1	-41.2726	174.779	-0.12	3.87	0.04	0.27	0.14	0.23
CONZ	-36.8438	286.974	0.53	1.36	0.52	0.56	0.52	0.56
AUCK	-36.6028	174.834	0.19	2.74	0.38	0.43	0.34	0.36
LPGS	-34.9067	302.068	0.21	2.06	0.25	0.4	0.25	0.39
ADE1	-34.729	138.647	0.17	2.43	0.29	0.32	0.28	0.31
SUTM	-32.3814	20.8109	-0.09	1.24	0.42	0.46	0.26	0.31
YAR3	-29.0465	115.347	-0.21	1.57	-0.05	0.15	-0.03	0.19
PRE1	-25.7463	28.224	0.11	1.12	0.35	0.37	0.2	0.23
UNSA	-24.7275	294.592	0.04	1.57	0.33	0.43	0.04	0.41
ALIC	-23.6701	133.886	-0.21	1.31	0.05	0.15	-0.03	0.13
CHPI	-22.6871	315.015	-0.08	1.13	0.07	0.21	-0.01	0.2
WIND	-22.5749	17.0894	0.17	0.71	0.44	0.48	0.29	0.33
KARR	-20.9814	117.097	-0.37	0.9	-0.07	0.15	-0.17	0.21
TOW2	-19.2693	147.056	0.35	1.11	0.36	0.38	0.38	0.41
TAH1	-17.577	210.394	0.48	0.92	0.1	0.2	0.13	0.19
KAT1	-14.376	132.153	-0.25	0.95	-0.06	0.14	-0.04	0.18
DARW	-12.8437	131.133	-0.13	0.87	-0.08	0.16	-0.09	0.16
COCO	-12.1883	96.834	0	0.58	-0.16	0.21	-0.13	0.19
XMIS	-10.45	105.689	0.16	0.59	0.23	0.31	0.18	0.27
NURK	-1.9446	30.0897	0.18	0.61	0.48	0.51	0.32	0.37
MSKU	-1.6316	13.552	-0.08	0.6	-0.08	0.24	-0.1	0.24
GLPS	-0.743	269.696	0.26	0.56	-0.15	0.23	-0.14	0.23
MBAR	-0.6015	30.7379	-0.01	0.59	0.2	0.29	0.05	0.22
MANA	12.1489	273.751	0	0.51	0.04	0.19	-0.01	0.17
IISC	13.0212	77.5704	0.01	0.7	0.22	0.26	0.16	0.22
BAN2	13.0343	77.5116	0.31	0.75	0.42	0.46	0.36	0.41
SSIA	13.6971	270.883	0.05	0.51	0.34	0.36	0.19	0.23
DAKA	14.6845	342.535	0.7	0.95	0.44	0.47	0.47	0.5
KOKB	22.1263	200.335	-0.47	0.9	-0.05	0.33	-0.25	0.42
TNML	24.798	120.987	-0.29	1.34	-0.25	0.4	-0.29	0.42
TCMS	24.798	120.987	-0.38	1.4	-0.31	0.44	-0.35	0.47
TWTF	24.9536	121.165	-0.11	1.27	-0.12	0.28	-0.16	0.34
AOML	25.7347	279.838	0.21	1.09	0.05	0.13	0.04	0.13
BAHR	26.2091	50.6081	0.28	1.1	0.36	0.46	0.35	0.45
WUHN	30.5317	114.357	-1.15	2.28	-1.05	1.51	-1.08	1.54
SIO3	32.8647	242.75	0.15	1.02	0.09	0.15	0.17	0.24
JPLM	34.2048	241.827	-0.23	1.06	-0.16	0.21	-0.22	0.3
DAEJ	36.3994	127.374	-0.07	1.7	-0.02	0.15	-0.01	0.18
OSN1	37.0776	127.024	0.05	1.68	0.24	0.29	0.24	0.27
PDEL	37.7477	334.337	0.26	2.56	0.03	0.2	0.04	0.19
SOL1	38.3189	283.546	0.07	2.34	-0.09	0.2	-0.07	0.18
USNO	38.919	282.934	0.1	2.59	0.05	0.56	0.03	0.55
WDC3	38.9206	282.934	-0.02	2.57	0.19	0.25	0.18	0.23
MIZU	39.1352	141.133	0.38	2.37	0.32	0.42	0.31	0.41
ANKR	39.8874	32.7585	-0.05	1.44	0.13	0.46	-0.01	0.47
NSSP	40.2265	44.5029	-0.15	1.56	-0.16	0.51	-0.25	0.52
VILL	40.4436	356.048	-0.04	1.89	-0.09	0.22	-0.17	0.26
MATE	40.6491	16.7045	0.45	2.04	0.19	0.33	0.14	0.28
TRAB	40.9947	39.7756	-0.13	1.93	-0.1	0.3	-0.16	0.37
TASH	41.328	69.2956	-0.22	1.71	0.05	0.31	0.08	0.26
SOFI	42.5561	23.3947	-1.05	2.23	-0.9	1.2	-1	1.27
WES2	42.6133	288.507	0.63	3	0.52	0.56	0.55	0.58
GUAO	43.4711	87.1773	0.02	1.15	0.12	0.42	-0.05	0.34
ZECK	43.7884	41.5651	-0.28	1.6	-0.06	0.29	-0.21	0.37
CHAN	43.7907	125.444	0.29	1.32	-0.01	0.11	-0.08	0.15
URUM	43.8079	87.6007	0.07	1.66	0.38	0.44	0.32	0.4
BARH	44.395	291.778	0.14	3.11	-0.02	0.27	-0.05	0.25
CRAO	44.4133	33.991	-0.26	2.1	-0.1	0.33	-0.12	0.3
HLFX	44.6835	296.389	0.32	3.14	0.33	0.38	0.36	0.4
NRC1	45.4542	284.376	0.48	2.87	0.52	0.58	0.52	0.58
UNBJ	45.9502	293.358	-0.17	3.1	-0.04	0.14	-0.05	0.15
ALGO	45.9558	281.929	0.15	2.73	0.15	0.45	0.09	0.46
ZIMM	46.8771	7.4653	0.23	2.35	0.16	0.32	0.14	0.21
YSSK	47.0297	142.717	0.17	2.57	0.14	0.27	0.1	0.24
GRAZ	47.0671	15.4935	0.55	2.17	-0.12	0.26	-0.13	0.2
STJO	47.5952	307.322	0.31	3.48	0.14	0.59	0.19	0.58
PENC	47.7896	19.2815	0.57	2.59	0.46	0.67	0.45	0.66
ULAB	47.8651	107.052	-0.09	1.8	0.09	0.18	-0.02	0.14
VALD	48.0971	282.436	0.03	2.75	0.13	0.26	0.12	0.22
ALBH	48.3898	236.512	0.44	2.47	0.25	0.62	0.3	0.61
WTZR	49.1442	12.8789	0.46	2.6	0.52	0.57	0.42	0.45
DRAO	49.3226	240.375	0.37	2.4	0.49	0.67	0.4	0.62
GOPE	49.9137	14.7856	0.1	2.77	0.15	1.13	0.05	1.11
TITZ	51.0353	6.4316	-0.31	3.26	-0.21	0.24	-0.18	0.21
WROC	51.1133	17.062	0.66	3.06	0.6	0.83	0.64	0.86
HRM1	51.4537	358.716	0.1	3.48	0.25	0.27	0.19	0.21
JOZE	52.0973	21.0315	0.25	3.06	0.28	0.34	0.25	0.31
JOZ2	52.0978	21.0324	0.74	3.1	0.76	0.78	0.72	0.74
BOR1	52.277	17.0735	-1.33	3.28	-1.12	1.14	-1.14	1.17
POTS	52.3793	13.0661	0.44	3.18	0.55	0.56	0.57	0.58
PETP	53.0667	158.607	-0.11	3.38	0.27	0.32	0.19	0.29
SCH2	54.8321	293.167	0.31	2.95	0.4	0.7	0.3	0.64
ZWE2	55.6993	36.7584	0.41	3.24	0.3	0.32	0.25	0.29
ZWEN	55.6993	36.7586	0	2.82	0.08	0.14	0.04	0.13
ARTU	56.4298	58.5605	0.09	3.38	0.06	0.15	0	0.16
RIGA	56.9486	24.0588	-0.05	3.36	0.08	0.17	0.02	0.1
CHUR	58.7591	265.911	-0.03	3.01	0.04	0.3	0.07	0.3
MAG0	59.5758	150.77	0.12	2.81	0.51	0.55	0.37	0.42
QAQ1	60.7153	313.952	-0.25	3.77	0.23	0.47	0.22	0.45
WHIT	60.7505	224.778	-0.9	2.86	-0.56	0.64	-0.64	0.7
YAKT	62.031	129.68	0.03	2.58	0.06	0.19	0.05	0.19
YAKZ	62.031	129.681	-0.53	3.11	-0.3	0.37	-0.29	0.36
YELL	62.4809	245.519	-0.41	3.29	-0.27	0.39	-0.27	0.38
HOFN	64.2673	344.802	-0.11	4.12	0.01	0.25	0	0.25
EIL1	64.6879	212.887	-0.04	3.48	0.06	0.36	0.09	0.32
FAIR	64.978	212.501	0.06	3.36	0.09	0.39	0.01	0.41
BILI	68.0761	166.438	-0.28	2.7	-0.05	0.32	-0.08	0.26
SCOR	70.4853	338.05	-0.11	3.88	0.06	0.21	0.04	0.21
TIXI	71.6345	128.866	-0.32	3.06	-0.05	0.24	-0.09	0.27
THU2	76.537	291.175	-0.4	3.4	-0.24	0.34	-0.21	0.31
THU3	76.537	291.175	-0.44	3.42	-0.24	0.33	-0.21	0.31
