# Supplementary material for: Determination of zenith hydrostatic delay and its impact on GNSS-derived integrated water vapor
Source: Copernicus journal article supplement (doi:10.5194/amt-10-2807-2017), 2017-08-07
Supplement: Supplementary file 2 [file amt-10-2807-2017-supplement.zip]

Archive with 7 entries (6 files):
- Supplement/
- Supplement/~$T_4nd_revision_20170413.docx
- Supplement/Supplment2_Monthly.xlsx
- Supplement/~$SupplmentNEW.xlsx
- Supplement/Supplement1_6hourly.xlsx
- Supplement/~$w Microsoft Word Document.docx
- amt-10-2807-2017-supplement-title-page.pdf
