# Supplementary material for: Determination of zenith hydrostatic delay and its impact on GNSS-derived integrated water vapor
Source: Copernicus journal article supplement (doi:10.5194/amt-10-2807-2017), 2017-08-07
Supplement: Supplementary file 2 [file Supplment2_Monthly.xlsx]

## Sheet: Biase
Site	Latitude	Longitude	IWV_GPT2w (mm)	IWV_ERA1 (mm)	IWV_ERA4 (mm)
DAV1	-68.5773	77.9726	0.07	0.12	0.04
OHIG	-63.3207	302.1	nan	nan	nan
RIO2	-53.7855	292.249	-0.47	-0.1	-0.01
RIOG	-53.7855	292.249	-0.15	-0.14	-0.06
OUS2	-45.8695	170.511	0.23	0.13	0.13
CHAT	-43.9558	183.434	-0.4	-0.23	-0.2
MQZG	-43.7027	172.655	0.15	0	-0.06
WEL1	-41.2726	174.779	-0.14	0.04	0.14
CONZ	-36.8438	286.974	0.53	0.51	0.51
AUCK	-36.6028	174.834	0.2	0.38	0.34
LPGS	-34.9067	302.068	0.21	0.24	0.24
ADE1	-34.729	138.647	0.19	0.29	0.28
SUTM	-32.3814	20.8109	-0.1	0.42	0.26
YAR3	-29.0465	115.347	-0.23	-0.05	-0.03
PRE1	-25.7463	28.224	0.11	0.35	0.2
UNSA	-24.7275	294.592	0.07	0.33	0.05
ALIC	-23.6701	133.886	-0.22	0.05	-0.03
CHPI	-22.6871	315.015	-0.1	0.07	-0.01
WIND	-22.5749	17.0894	0.17	0.45	0.29
KARR	-20.9814	117.097	-0.37	-0.07	-0.17
TOW2	-19.2693	147.056	0.35	0.36	0.38
TAH1	-17.577	210.394	0.49	0.1	0.13
KAT1	-14.376	132.153	-0.25	-0.06	-0.04
DARW	-12.8437	131.133	-0.13	-0.07	-0.09
COCO	-12.1883	96.834	0.01	-0.16	-0.13
XMIS	-10.45	105.689	0.18	0.23	0.18
NURK	-1.9446	30.0897	0.19	0.48	0.32
MSKU	-1.6316	13.552	-0.07	-0.08	-0.1
GLPS	-0.743	269.696	0.26	-0.16	-0.15
MBAR	-0.6015	30.7379	-0.03	0.2	0.05
MANA	12.1489	273.751	-0.01	0.04	0
IISC	13.0212	77.5704	0	0.22	0.16
BAN2	13.0343	77.5116	0.27	0.39	0.33
SSIA	13.6971	270.883	0.05	0.34	0.19
DAKA	14.6845	342.535	0.73	0.4	0.45
KOKB	22.1263	200.335	-0.47	-0.11	-0.32
TCMS	24.798	120.987	-0.3	-0.28	-0.31
TNML	24.798	120.987	-0.32	-0.3	-0.34
TWTF	24.9536	121.165	-0.11	-0.12	-0.17
AOML	25.7347	279.838	0.22	0.05	0.04
BAHR	26.2091	50.6081	0.27	0.36	0.35
WUHN	30.5317	114.357	-1.23	-1.17	-1.2
SIO3	32.8647	242.75	0.19	0.09	0.17
JPLM	34.2048	241.827	-0.23	-0.16	-0.22
DAEJ	36.3994	127.374	-0.03	-0.01	0
OSN1	37.0776	127.024	0.07	0.24	0.24
PDEL	37.7477	334.337	0.3	0.03	0.04
SOL1	38.3189	283.546	0.04	-0.09	-0.07
USNO	38.919	282.934	0.05	0.02	0
WDC3	38.9206	282.934	-0.01	0.18	0.17
MIZU	39.1352	141.133	0.29	0.3	0.28
ANKR	39.8874	32.7585	-0.12	0.11	-0.03
NSSP	40.2265	44.5029	-0.15	-0.15	-0.24
VILL	40.4436	356.048	-0.13	-0.1	-0.17
MATE	40.6491	16.7045	0.26	0.19	0.14
TRAB	40.9947	39.7756	-0.19	-0.1	-0.16
TASH	41.328	69.2956	-0.2	0.06	0.09
SOFI	42.5561	23.3947	-1.07	-0.83	-0.93
WES2	42.6133	288.507	0.5	0.51	0.55
GUAO	43.4711	87.1773	0.01	0.12	-0.05
ZECK	43.7884	41.5651	-0.28	-0.05	-0.19
CHAN	43.7907	125.444	0.32	-0.02	-0.09
URUM	43.8079	87.6007	0.08	0.37	0.32
BARH	44.395	291.778	0.09	-0.03	-0.07
CRAO	44.4133	33.991	-0.27	-0.11	-0.13
HLFX	44.6835	296.389	0.34	0.33	0.36
NRC1	45.4542	284.376	0.48	0.5	0.51
UNBJ	45.9502	293.358	-0.13	-0.04	-0.05
ALGO	45.9558	281.929	0.07	0.14	0.08
ZIMM	46.8771	7.4653	0.22	0.16	0.14
YSSK	47.0297	142.717	0.2	0.14	0.11
GRAZ	47.0671	15.4935	0.52	-0.15	-0.15
STJO	47.5952	307.322	0.39	0.14	0.19
PENC	47.7896	19.2815	0.45	0.45	0.44
ULAB	47.8651	107.052	-0.07	0.08	-0.03
VALD	48.0971	282.436	0.03	0.13	0.11
ALBH	48.3898	236.512	0.42	0.23	0.28
WTZR	49.1442	12.8789	0.48	0.52	0.42
DRAO	49.3226	240.375	0.39	0.48	0.38
GOPE	49.9137	14.7856	0.08	0.12	0.02
TITZ	51.0353	6.4316	-0.44	-0.21	-0.18
WROC	51.1133	17.062	0.6	0.56	0.6
HRM1	51.4537	358.716	0.16	0.24	0.19
JOZE	52.0973	21.0315	0.3	0.28	0.24
JOZ2	52.0978	21.0324	0.8	0.75	0.72
BOR1	52.277	17.0735	-1.33	-1.11	-1.14
POTS	52.3793	13.0661	0.49	0.55	0.57
PETP	53.0667	158.607	-0.12	0.26	0.18
SCH2	54.8321	293.167	0.31	0.37	0.26
ZWE2	55.6993	36.7584	0.34	0.29	0.24
ZWEN	55.6993	36.7586	0.39	0.08	0.05
ARTU	56.4298	58.5605	0.12	0.06	0
RIGA	56.9486	24.0588	-0.09	0.07	0.02
CHUR	58.7591	265.911	-0.08	0.03	0.06
MAG0	59.5758	150.77	0.17	0.51	0.37
QAQ1	60.7153	313.952	-0.27	0.22	0.22
WHIT	60.7505	224.778	-1.05	-0.54	-0.62
YAKT	62.031	129.68	0.05	0.05	0.04
YAKZ	62.031	129.681	nan	nan	nan
YELL	62.4809	245.519	-0.48	-0.27	-0.27
HOFN	64.2673	344.802	-0.22	0.01	0
EIL1	64.6879	212.887	-0.04	0.05	0.09
FAIR	64.978	212.501	0.07	0.08	0
BILI	68.0761	166.438	-0.24	-0.04	-0.07
SCOR	70.4853	338.05	-0.04	0.05	0.04
TIXI	71.6345	128.866	-0.28	-0.07	-0.11
THU2	76.537	291.175	-0.42	-0.24	-0.21
THU3	76.537	291.175	-0.43	-0.24	-0.21

## Sheet: RMS
Site	Latitude	Longitude	IWV_GPT2w (mm)	IWV_ERA1 (mm)	IWV_ERA_4 (mm)
DAV1	-68.5773	77.9726	1.37	0.13	0.06
OHIG	-63.3207	302.1	nan	nan	nan
RIO2	-53.7855	292.249	1.43	0.12	0.06
RIOG	-53.7855	292.249	1.49	0.17	0.1
OUS2	-45.8695	170.511	1.2	0.3	0.3
CHAT	-43.9558	183.434	1.46	0.24	0.22
MQZG	-43.7027	172.655	0.78	0.08	0.08
WEL1	-41.2726	174.779	0.77	0.08	0.14
CONZ	-36.8438	286.974	0.6	0.52	0.52
AUCK	-36.6028	174.834	0.97	0.39	0.35
LPGS	-34.9067	302.068	0.65	0.29	0.29
ADE1	-34.729	138.647	1.03	0.29	0.28
SUTM	-32.3814	20.8109	0.42	0.43	0.27
YAR3	-29.0465	115.347	0.71	0.06	0.08
PRE1	-25.7463	28.224	0.36	0.35	0.2
UNSA	-24.7275	294.592	0.4	0.34	0.16
ALIC	-23.6701	133.886	0.5	0.07	0.04
CHPI	-22.6871	315.015	0.36	0.09	0.05
WIND	-22.5749	17.0894	0.31	0.45	0.3
KARR	-20.9814	117.097	0.5	0.08	0.17
TOW2	-19.2693	147.056	0.59	0.36	0.38
TAH1	-17.577	210.394	0.64	0.12	0.14
KAT1	-14.376	132.153	0.35	0.06	0.09
DARW	-12.8437	131.133	0.31	0.08	0.09
COCO	-12.1883	96.834	0.31	0.17	0.14
XMIS	-10.45	105.689	0.29	0.24	0.19
NURK	-1.9446	30.0897	0.26	0.48	0.32
MSKU	-1.6316	13.552	0.16	0.09	0.1
GLPS	-0.743	269.696	0.33	0.16	0.15
MBAR	-0.6015	30.7379	0.17	0.2	0.06
MANA	12.1489	273.751	0.13	0.1	0.07
IISC	13.0212	77.5704	0.24	0.22	0.17
BAN2	13.0343	77.5116	0.33	0.39	0.33
SSIA	13.6971	270.883	0.16	0.34	0.19
DAKA	14.6845	342.535	0.75	0.41	0.46
KOKB	22.1263	200.335	0.67	0.29	0.41
TCMS	24.798	120.987	0.55	0.34	0.34
TNML	24.798	120.987	0.52	0.36	0.36
TWTF	24.9536	121.165	0.47	0.16	0.22
AOML	25.7347	279.838	0.54	0.06	0.05
BAHR	26.2091	50.6081	0.52	0.42	0.41
WUHN	30.5317	114.357	1.75	1.58	1.6
SIO3	32.8647	242.75	0.37	0.1	0.19
JPLM	34.2048	241.827	0.4	0.17	0.24
DAEJ	36.3994	127.374	0.54	0.04	0.05
OSN1	37.0776	127.024	0.42	0.25	0.24
PDEL	37.7477	334.337	1.33	0.1	0.09
SOL1	38.3189	283.546	0.65	0.1	0.08
USNO	38.919	282.934	0.75	0.08	0.08
WDC3	38.9206	282.934	0.84	0.2	0.19
MIZU	39.1352	141.133	0.82	0.36	0.34
ANKR	39.8874	32.7585	0.58	0.32	0.35
NSSP	40.2265	44.5029	0.64	0.4	0.42
VILL	40.4436	356.048	0.52	0.12	0.19
MATE	40.6491	16.7045	0.76	0.21	0.15
TRAB	40.9947	39.7756	0.82	0.18	0.23
TASH	41.328	69.2956	0.56	0.2	0.2
SOFI	42.5561	23.3947	1.42	1.08	1.16
WES2	42.6133	288.507	0.99	0.51	0.55
GUAO	43.4711	87.1773	0.46	0.31	0.25
ZECK	43.7884	41.5651	0.59	0.17	0.26
CHAN	43.7907	125.444	0.34	0.03	0.09
URUM	43.8079	87.6007	0.59	0.38	0.33
BARH	44.395	291.778	0.85	0.06	0.08
CRAO	44.4133	33.991	0.89	0.14	0.15
HLFX	44.6835	296.389	1.01	0.34	0.38
NRC1	45.4542	284.376	0.96	0.54	0.54
UNBJ	45.9502	293.358	0.93	0.05	0.06
ALGO	45.9558	281.929	0.8	0.41	0.4
ZIMM	46.8771	7.4653	1.15	0.18	0.14
YSSK	47.0297	142.717	0.85	0.19	0.17
GRAZ	47.0671	15.4935	0.94	0.17	0.15
STJO	47.5952	307.322	1.24	0.55	0.56
PENC	47.7896	19.2815	1.12	0.45	0.44
ULAB	47.8651	107.052	0.64	0.11	0.06
VALD	48.0971	282.436	0.79	0.17	0.16
ALBH	48.3898	236.512	0.92	0.37	0.4
WTZR	49.1442	12.8789	1.16	0.53	0.43
DRAO	49.3226	240.375	0.86	0.61	0.56
GOPE	49.9137	14.7856	1.44	1.05	1.05
TITZ	51.0353	6.4316	1.46	0.21	0.18
WROC	51.1133	17.062	1.56	0.79	0.82
HRM1	51.4537	358.716	1.04	0.25	0.19
JOZE	52.0973	21.0315	1.42	0.29	0.26
JOZ2	52.0978	21.0324	1.58	0.76	0.72
BOR1	52.277	17.0735	1.96	1.13	1.15
POTS	52.3793	13.0661	1.39	0.56	0.57
PETP	53.0667	158.607	1.67	0.27	0.2
SCH2	54.8321	293.167	0.97	0.62	0.56
ZWE2	55.6993	36.7584	1.46	0.3	0.25
ZWEN	55.6993	36.7586	0.55	0.09	0.07
ARTU	56.4298	58.5605	1.72	0.08	0.04
RIGA	56.9486	24.0588	1.33	0.09	0.04
CHUR	58.7591	265.911	0.9	0.25	0.24
MAG0	59.5758	150.77	1.4	0.52	0.38
QAQ1	60.7153	313.952	1.77	0.26	0.25
WHIT	60.7505	224.778	1.39	0.55	0.63
YAKT	62.031	129.68	1.06	0.12	0.11
YAKZ	62.031	129.681	nan	nan	nan
YELL	62.4809	245.519	1.18	0.31	0.31
HOFN	64.2673	344.802	1.66	0.11	0.1
EIL1	64.6879	212.887	1.47	0.11	0.11
FAIR	64.978	212.501	0.95	0.25	0.24
BILI	68.0761	166.438	1.15	0.13	0.12
SCOR	70.4853	338.05	2.24	0.1	0.09
TIXI	71.6345	128.866	1.37	0.1	0.16
THU2	76.537	291.175	1.52	0.25	0.22
THU3	76.537	291.175	1.58	0.25	0.22

## Sheet: Relative RMS
Site	Latitude	Longitude	IWV_GPT2w (%)	IWV_ERA1 (%)	IWV_ERA4 (%)
DAV1	-68.5773	77.9726	37.66	3.67	1.69
OHIG	-63.3207	302.1	nan	nan	nan
RIO2	-53.7855	292.249	14.3	1.21	0.59
RIOG	-53.7855	292.249	14.64	1.66	0.97
OUS2	-45.8695	170.511	7.98	1.98	2
CHAT	-43.9558	183.434	8.99	1.5	1.34
MQZG	-43.7027	172.655	5.45	0.56	0.59
WEL1	-41.2726	174.779	5.1	0.53	0.94
CONZ	-36.8438	286.974	4.12	3.58	3.58
AUCK	-36.6028	174.834	5.07	2.01	1.81
LPGS	-34.9067	302.068	3.2	1.44	1.4
ADE1	-34.729	138.647	6.42	1.83	1.76
SUTM	-32.3814	20.8109	5.39	5.46	3.42
YAR3	-29.0465	115.347	3.69	0.32	0.44
PRE1	-25.7463	28.224	2.22	2.17	1.25
UNSA	-24.7275	294.592	2.08	1.79	0.85
ALIC	-23.6701	133.886	2.65	0.35	0.21
CHPI	-22.6871	315.015	1.2	0.3	0.18
WIND	-22.5749	17.0894	2.25	3.31	2.18
KARR	-20.9814	117.097	2.14	0.35	0.75
TOW2	-19.2693	147.056	1.74	1.07	1.14
TAH1	-17.577	210.394	1.78	0.33	0.38
KAT1	-14.376	132.153	1.08	0.19	0.29
DARW	-12.8437	131.133	0.79	0.2	0.24
COCO	-12.1883	96.834	0.74	0.39	0.33
XMIS	-10.45	105.689	0.73	0.6	0.47
NURK	-1.9446	30.0897	0.91	1.7	1.13
MSKU	-1.6316	13.552	0.34	0.18	0.22
GLPS	-0.743	269.696	0.81	0.39	0.37
MBAR	-0.6015	30.7379	0.56	0.66	0.21
MANA	12.1489	273.751	0.29	0.22	0.16
IISC	13.0212	77.5704	0.77	0.72	0.56
BAN2	13.0343	77.5116	1.08	1.29	1.1
SSIA	13.6971	270.883	0.42	0.9	0.49
DAKA	14.6845	342.535	2.07	1.14	1.28
KOKB	22.1263	200.335	4.26	1.87	2.62
TCMS	24.798	120.987	1.45	0.89	0.9
TNML	24.798	120.987	1.35	0.93	0.94
TWTF	24.9536	121.165	1.25	0.43	0.58
AOML	25.7347	279.838	1.59	0.18	0.16
BAHR	26.2091	50.6081	2.7	2.21	2.15
WUHN	30.5317	114.357	5.87	5.3	5.39
SIO3	32.8647	242.75	2.24	0.58	1.15
JPLM	34.2048	241.827	2.85	1.18	1.68
DAEJ	36.3994	127.374	2.64	0.19	0.27
OSN1	37.0776	127.024	2.1	1.23	1.2
PDEL	37.7477	334.337	5.64	0.41	0.39
SOL1	38.3189	283.546	3	0.48	0.37
USNO	38.919	282.934	3.61	0.39	0.37
WDC3	38.9206	282.934	4.17	0.99	0.93
MIZU	39.1352	141.133	4.18	1.82	1.76
ANKR	39.8874	32.7585	4.37	2.4	2.67
NSSP	40.2265	44.5029	4.95	3.09	3.3
VILL	40.4436	356.048	3.21	0.76	1.18
MATE	40.6491	16.7045	5.07	1.38	1.02
TRAB	40.9947	39.7756	4.32	0.96	1.22
TASH	41.328	69.2956	4.35	1.51	1.51
SOFI	42.5561	23.3947	9.34	7.12	7.61
WES2	42.6133	288.507	6.18	3.22	3.44
GUAO	43.4711	87.1773	5.87	3.88	3.2
ZECK	43.7884	41.5651	4.42	1.3	1.98
CHAN	43.7907	125.444	2.49	0.2	0.63
URUM	43.8079	87.6007	5.72	3.72	3.2
BARH	44.395	291.778	6.16	0.42	0.59
CRAO	44.4133	33.991	5.63	0.86	0.97
HLFX	44.6835	296.389	5.91	2.02	2.22
NRC1	45.4542	284.376	6.25	3.5	3.51
UNBJ	45.9502	293.358	6.02	0.33	0.36
ALGO	45.9558	281.929	5.12	2.65	2.54
ZIMM	46.8771	7.4653	8.78	1.39	1.1
YSSK	47.0297	142.717	6.51	1.47	1.3
GRAZ	47.0671	15.4935	5.66	1.01	0.92
STJO	47.5952	307.322	8.26	3.67	3.71
PENC	47.7896	19.2815	6.38	2.57	2.5
ULAB	47.8651	107.052	10.48	1.73	1.01
VALD	48.0971	282.436	6.05	1.33	1.26
ALBH	48.3898	236.512	5.93	2.4	2.58
WTZR	49.1442	12.8789	8.68	3.96	3.18
DRAO	49.3226	240.375	7.03	4.97	4.54
GOPE	49.9137	14.7856	10.35	7.55	7.52
TITZ	51.0353	6.4316	8.87	1.3	1.11
WROC	51.1133	17.062	9.45	4.77	4.95
HRM1	51.4537	358.716	6.15	1.45	1.14
JOZE	52.0973	21.0315	9.14	1.9	1.68
JOZ2	52.0978	21.0324	9.82	4.7	4.48
BOR1	52.277	17.0735	12.33	7.1	7.27
POTS	52.3793	13.0661	8.98	3.59	3.69
PETP	53.0667	158.607	17.41	2.78	2.08
SCH2	54.8321	293.167	9.87	6.32	5.72
ZWE2	55.6993	36.7584	10.58	2.17	1.84
ZWEN	55.6993	36.7586	3.42	0.52	0.43
ARTU	56.4298	58.5605	14.41	0.65	0.36
RIGA	56.9486	24.0588	8.91	0.63	0.29
CHUR	58.7591	265.911	9.29	2.57	2.48
MAG0	59.5758	150.77	16.77	6.18	4.55
QAQ1	60.7153	313.952	18.81	2.72	2.64
WHIT	60.7505	224.778	20.45	8.09	9.25
YAKT	62.031	129.68	10.96	1.22	1.17
YAKZ	62.031	129.681	nan	nan	nan
YELL	62.4809	245.519	12.65	3.33	3.3
HOFN	64.2673	344.802	12.86	0.83	0.8
EIL1	64.6879	212.887	14.72	1.14	1.08
FAIR	64.978	212.501	11.53	3	2.86
BILI	68.0761	166.438	19.5	2.15	2.1
SCOR	70.4853	338.05	32.83	1.45	1.35
TIXI	71.6345	128.866	21.56	1.6	2.58
THU2	76.537	291.175	27.09	4.46	3.94
THU3	76.537	291.175	29.74	4.71	4.19
